# Supplementary material for: Heavy Metals Content in Selected Medicinal Plants Produced and Consumed in Serbia and Their Daily Intake in Herbal Infusions
Source: MDPI journal article supplement (doi:10.3390/toxics11020198), 2023-02-20
Supplement: s1 [file s1]

## Supplementary materials 1

**Table S1.** Metal solvation coefficient  $C_d$  during the infusion preparation [6].

| Heavy metals  | Mass transfer in herbal infusions (%) |
|---------------|---------------------------------------|
| Cadmium (Cd)  | 14                                    |
| Chromium (Cr) | 15                                    |
| Nickel (Ni)   | 31                                    |
| Mercury (Hg)  | /                                     |
| Lead (Pb)     | 20                                    |

**Table S2.** Transfer rate of toxic metal from medicinal herb into the infusion [26].

| Heavy metals  | Transfer in herbal infusions [%] |
|---------------|----------------------------------|
| Cadmium (Cd)  | 14.18                            |
| Chromium (Cr) | 11.45                            |
| Nickel (Ni)   | 67.71                            |
| Mercury (Hg)  | /                                |
| Lead (Pb)     | 7.11                             |

**Table S3.** The oral reference dose regulated by the U.S. Environmental Protection Agency (US EPA) [61].

| Heavy metals  | Reference dose [mg/kg/day] |
|---------------|----------------------------|
| Cadmium (Cd)  | 0.0005                     |
| Chromium (Cr) | 1.5                        |
| Nickel (Ni)   | 0.02                       |
| Mercury (Hg)  | /                          |
| Lead (Pb)     | 0.0015                     |

The oral reference dose value for Cr was set as the value for Cr(III) due to the fact that Cr(VI) could be reduced to Cr(III) under acidic conditions in the stomach [62].
